# Supplementary material
Source: Springer Nature journal article supplement (https://www.springermedizin.de/resource/supplementary/12992_2013_250_MOESM1_ESM.pdf/9616198)

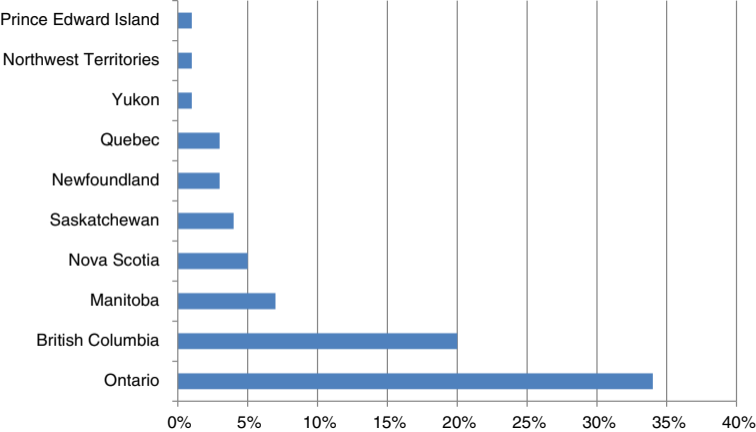

Supplement: MOESM1 [file 9616198]
